# Supplementary material for: Septins Are Important for Cell Polarity, Septation and Asexual Spore Formation in Neurospora crassa and Show Different Patterns of Localisation at Germ Tube Tips
Source: PubMed Central journal article supplement (PMC3653863; doi:10.1371/journal.pone.0063843), 2013-05-14

*WT*

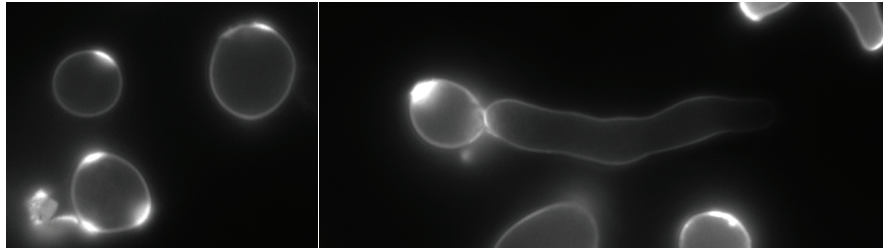

*Δcdc-3*

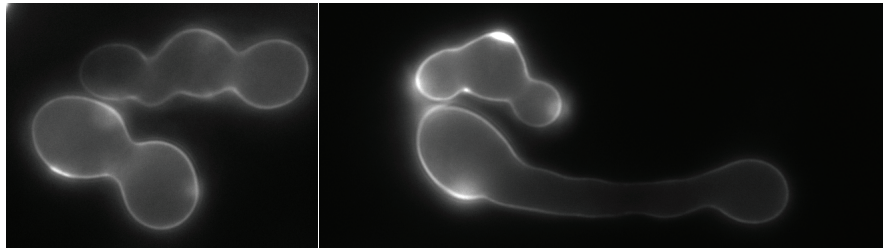

*Δcdc-10*

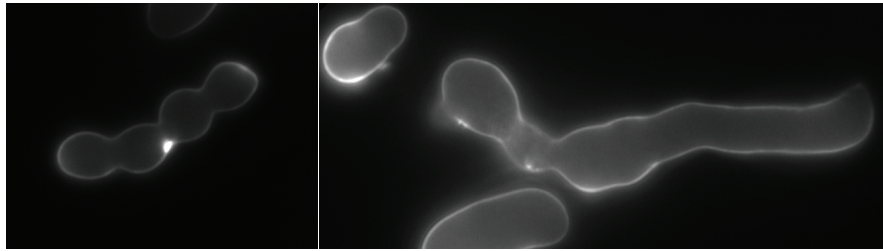

*Δcdc-11*

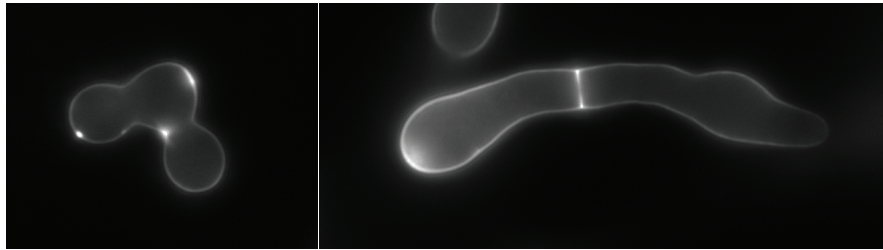

*Δcdc-12*

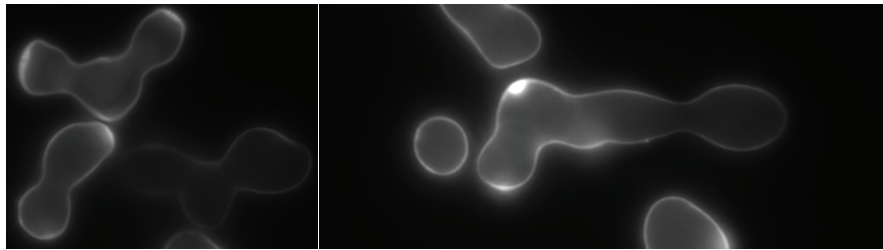

*Δasp-1*

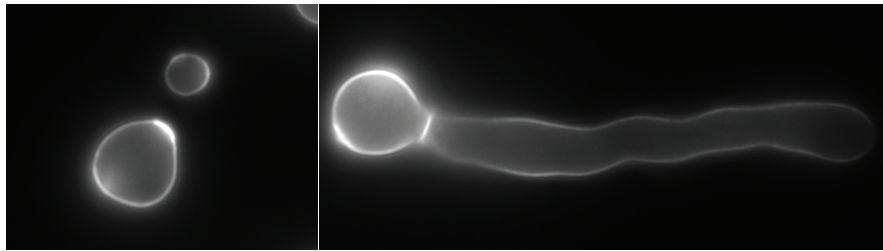

*Δasp-2*

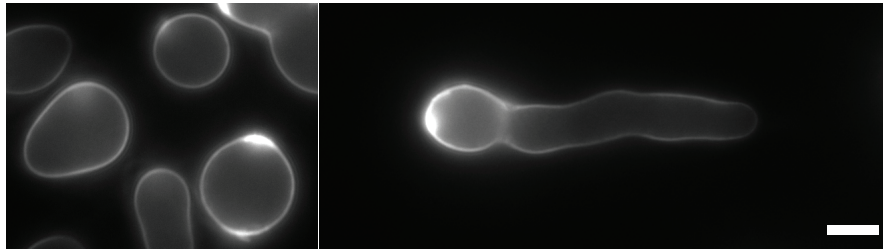

Supplement: pone.0063843.s001.pdf [file pone.0063843.s001.pdf]
